# Supplementary material for: Integrating dorsolateral prefrontal cortex multi-omics and GWAS summary data reveals genetic etiology of Parkinson’s disease
Source: Research Square preprint supplement (doi:10.21203/rs.3.rs-9622597/v1), 2026-05-28
Supplement: Supplementary file 1 [file 3d5c71ea5e8bbfd3a6b17f2f.xlsx]

## Sheet: Supp. Data 1. Bulk TWAS-O
Supplementary Data 1. Bulk TWAS-O risk genes of PD.
Listed are chromosome, start position, omnibus TWAS-O p-value, and TWAS p-values by TIGAR/DPR, PrediXcan/EN, and FUSION.
Note: The bulk TWAS-O analysis in this study uses a stringent genome-wide significance threshold (p-value<2.5E-06).
Gene	CHR	Start Position	TWAS-O P-value	TIGAR P-value	PrediXcan P-value	FUSION P-value
EFNA3a,b	1	155078872	6e-07	3.27e-06	3.3e-07	NA
RAB29a,b	1	205767986	8.53e-09	0.00193	2.84e-09	0.00792
ACOX2b	3	58505136	8.99e-08	3.05e-08	3.52e-05	1.84e-06
GAKa,b	4	849276	3.37e-10	4.67e-10	1.48e-10	1.52e-06
TMEM175a	4	932387	5.36e-07	1.35e-06	1.46e-05	2.09e-07
IDUA	4	986997	4.95e-10	3.68e-08	1.66e-10	8.45e-07
CD38a,b	4	15778275	3.82e-16	6.96e-15	1.3e-16	2.72e-09
SCARB2a,b	4	76158733	1.63e-10	1.78e-07	5.45e-11	3.26e-08
MMRN1a,b	4	89879532	8.38e-18	1.39e-14	2.8e-18	1.05e-12
NDUFAF2a,b	5	60945129	1.01e-07	2.14e-07	4.02e-08	3.7e-06
NUPL2b	7	23181827	7.7e-08	1.1e-07	9.63e-08	5.12e-08
GPNMBa,b	7	23235967	8.83e-09	6.33e-09	1.03e-08	1.18e-08
CTSBa,b	8	11842524	1.65e-06	7.34e-07	2.17e-06	0.304
SH3GL2a,b	9	17579082	1.24e-06	1.27e-06	1.54e-06	1.02e-06
ABCB9b	12	122920951	7.16e-07	NA	7.16e-07	NA
UBE2I	16	1308880	1.42e-06	0.0459	0.508	4.75e-07
TSR3	16	1349240	1.79e-06	0.457	0.366	5.97e-07
MRPS34b	16	1771890	7.29e-08	NA	NA	7.29e-08
ADORA2Bb	17	15944917	5.41e-07	2.15e-07	1.13e-06	0.000406
ZSWIM7	17	15976560	3.76e-07	2.22e-06	2.05e-07	NA
TTC19	17	15999380	1.13e-06	0.000101	3.77e-07	0.0187
NCOR1b	17	16029157	6.7e-07	1.23e-06	4.61e-07	NA
PLCD3	17	45108967	9.28e-10	0.732	0.619	3.09e-10
ACBD4	17	45132600	1.01e-18	0.128	0.00936	3.37e-19
AC142472.1	17	45146730	2.3e-12	2.3e-12	NA	NA
HEXIM1	17	45148502	1.18e-19	5.49e-05	0.0169	3.93e-20
LRRC37A4P	17	45506741	2.57e-20	1.32e-18	2.77e-10	8.63e-21
LINC02210a,b	17	45620328	6.94e-20	7.21e-19	2.27e-17	2.39e-20
CRHR1a	17	45784280	5.38e-20	4.57e-09	6.54e-11	1.79e-20
MAPT-AS1a	17	45799390	1.44e-07	5.79e-08	7.81e-06	2.86e-07
MAPTa	17	45894382	4.94e-20	7.64e-17	7.45e-11	1.65e-20
MAPT-IT1	17	45895783	1.86e-20	NA	NA	1.86e-20
LRRC37A	17	46292733	8.66e-08	0.016	2.89e-08	0.0195
LRRC37A2	17	46511511	7.2e-10	2.4e-10	1.32e-06	0.913
ARL17A	17	46516702	6.33e-07	2.11e-07	0.028	0.725
NSFa,b	17	46590669	9.04e-20	2.18e-07	5.49e-08	3.01e-20
WNT3a	17	46762506	1.29e-19	0.0155	0.0145	4.32e-20
AC005670.2b	17	46923133	1.35e-17	1.41e-13	0.0571	4.5e-18
LRRC37A17P	17	46978481	2.11e-18	3.44e-18	8.83e-19	2.3e-06
u a denotes Known GWAS risk genes of PD reported in GWAS Catalogue.
u b denotes independent risk genes.

## Sheet: Supp. Data 2. Astrocytes
Supplementary Data 2. Cell-type-aware TWAS-O results in Astrocytes.
Cell-type-aware TWAS-O results showing the chromosome, start position, TWAS-O p-value, TWAS p-values by TIGAR/DPR, PrediXcan/EN, and FUSION.
Gene	CHR	Start Position	TWAS-O P-value	TIGAR P-value	PrediXcan P-value	FUSION P-value
ACBD3d,e	1	226144679	3.81e-07	3.81e-07	NA	NA
CLEC3Bc,d,e	3	45001548	1.69e-06	0.0378	NA	8.43e-07
GPRIN3a,b,d	4	89236383	1.75e-07	1.75e-07	NA	NA
ERCC8b,d,e	5	60873831	1.43e-09	1.07e-09	NA	2.15e-09
FAHD1b,c,d	16	1826941	6.28e-08	NA	NA	6.28e-08
ADAM11b,c	17	44758988	3.24e-13	0.297	NA	1.62e-13
EFTUD2b,c	17	44849948	6.5e-09	0.332	NA	3.25e-09
GFAPb,c,d	17	44903159	7.24e-08	7.24e-08	NA	NA
KIF18Bb,c	17	44924709	1.03e-18	4.04e-06	NA	5.13e-19
C1QL1b,c,d	17	44959693	6.32e-17	6.32e-17	NA	NA
DCAKDb,c	17	45023340	6.09e-14	0.0183	0.0104	2.03e-14
HEXIM1b,c	17	45148475	4.39e-18	0.834	NA	2.19e-18
ARHGAP27a,b,c	17	45393902	9.43e-07	4.71e-07	0.379	NA
PLEKHM1a,b,c	17	45435900	1.82e-07	1.82e-07	NA	NA
CRHR1a,b,c	17	45784280	4.76e-20	1.62e-17	NA	2.38e-20
KANSL1a,b,c	17	46029916	1.08e-06	3.62e-07	6.68e-05	0.236
ARL17Bb,c	17	46274784	1.85e-15	4.18e-09	0.0296	6.15e-16
LRRC37Ab,c,d	17	46292733	6.23e-12	3.11e-12	7.25e-05	NA
LRRC37A2b,c,d	17	46511511	1.3e-10	4.32e-11	3.51e-07	0.000316
WNT9Bb,c	17	46833201	4.96e-19	6.32e-07	NA	2.48e-19
EIF2S2d,e	20	34088309	1e-06	1.48e-06	NA	7.54e-07
u a denotes Known GWAS risk genes of PD reported in GWAS Catalogue.
u b denotes TWAS risk genes also identified by bulk TWAS-O analyses.
u c denotes TWAS risk genes also identified by bulk PWAS-O analyses.
u d denotes independent risk genes.
u e denotes cell-type-specific TWAS risk genes only identified by this cell type.

## Sheet: Supp. Data 3.Microglia
Supplementary Data 3. Cell-type-aware TWAS-O risk genes of PD in Microglia.
Cell-type-aware TWAS-O results showing the chromosome, start position, TWAS-O p-value, TWAS p-values by TIGAR/DPR, PrediXcan/EN, and FUSION.
Gene	CHR	Start Position	TWAS-O P-value	TIGAR P-value	PrediXcan P-value	FUSION P-value
KHKc,d,e	2	27086747	2.26e-06	9.79e-05	NA	1.15e-06
TMEM163a,d	2	134455759	2.16e-11	7.04e-07	4.53e-09	7.2e-12
BST1a,b,c,d,e	4	15703065	1.06e-06	1.06e-06	NA	NA
FAM13Ab,d	4	88725955	5.01e-09	1.67e-09	9.54e-07	3.51e-05
SNCAa,b,e	4	89700345	8.66e-07	4.44e-07	NA	1.75e-05
ZSWIM6b,d,e	5	61332258	1.3e-08	1.3e-08	NA	NA
GPNMBa,b,c,d	7	23235967	2.41e-08	1.81e-08	3.03e-08	2.77e-08
CLCN7b,c,e	16	1444934	9.8e-07	0.796	0.495	3.27e-07
EME2b,c	16	1772810	1.63e-07	0.00118	NA	8.14e-08
SPSB3b,c,d	16	1776712	1.55e-07	0.015	NA	7.76e-08
MSRB1b,c,e	16	1938210	2.08e-07	0.459	NA	1.04e-07
CCDC43b,c	17	44673069	8.52e-15	NA	0.000165	4.2e-15
GFAPb,c	17	44903159	1.22e-18	NA	NA	1.22e-18
KIF18Bb,c	17	44924709	3.69e-10	3.69e-10	NA	NA
C1QL1b,c	17	44959693	1.36e-17	0.00076	NA	6.81e-18
PLCD3b,c	17	45108959	9.23e-20	0.000384	NA	4.62e-20
MAP3K14b,c,e	17	45263119	1.7e-19	0.263	NA	8.48e-20
PLEKHM1a,b,c	17	45435900	2.07e-06	2.07e-06	NA	NA
CRHR1a,b,c	17	45784280	4.99e-10	4.99e-10	NA	NA
SPPL2Ca,b,c	17	45844881	8.88e-16	8.88e-16	NA	NA
MAPTa,b,c	17	45894382	3.12e-19	0.801	NA	1.56e-19
ARL17Bb,c	17	46274784	4.64e-20	9.23e-16	8.38e-16	1.55e-20
LRRC37Ab,c	17	46292733	8.27e-20	1.13e-12	0.82	2.76e-20
RPRMLb,c,d	17	46978156	2.21e-16	0.0212	NA	1.11e-16
u a denotes Known GWAS risk genes of PD reported in GWAS Catalogue.
u b denotes TWAS risk genes also identified by bulk TWAS-O analyses.
u c denotes TWAS risk genes also identified by bulk PWAS-O analyses.
u d denotes independent risk genes.
u e denotes cell-type-specific TWAS risk genes only identified by this cell type.

## Sheet: Supp. Data4. Excitatory Neurons
Supplementary Data 4. Cell-type-aware TWAS-O risk genes of PD in Excitatory Neurons.
Cell-type-aware TWAS-O results showing the chromosome, start position, TWAS-O p-value, TWAS p-values by TIGAR/DPR, PrediXcan/EN, and FUSION.
Gene	CHR	Start Position	TWAS-O P-value	TIGAR P-value	PrediXcan P-value	FUSION P-value
GPR171d	3	151197832	1.88e-06	0.00724	0.00398	6.26e-07
FGFRL1b,d,e	4	1009936	3.01e-15	2.99e-05	1.52e-15	NA
CD38a,b,c,d	4	15778275	4.41e-10	2.38e-10	3.01e-09	NA
GPNMBa,b,c,d	7	23235967	7.6e-08	9.98e-07	2.6e-08	0.000145
EME2b,c	16	1772810	1.63e-07	0.000476	NA	8.14e-08
SPSB3b,c,d	16	1776712	1.55e-07	0.0262	NA	7.76e-08
DBF4Bb,c,e	17	44708608	6.8e-10	0.0061	0.00073	2.27e-10
ADAM11b,c	17	44758988	9.11e-16	1.84e-05	0.00485	3.04e-16
HIGD1Bb,c	17	44846353	2.76e-12	2.76e-12	NA	NA
EFTUD2b,c	17	44849948	1.61e-18	NA	NA	1.61e-18
GFAPb,c	17	44903159	3.74e-08	3.74e-08	NA	NA
KIF18Bb,c	17	44924709	2.45e-19	1.22e-10	NA	1.23e-19
C1QL1b,c	17	44959693	9.62e-13	9.62e-13	NA	NA
DCAKDb,c	17	45023340	3.98e-19	0.0449	0.00842	1.33e-19
PLCD3b,c	17	45108959	8.47e-13	8.47e-13	NA	NA
HEXIM1b,c	17	45148475	1.06e-16	0.703	NA	5.32e-17
PLEKHM1a,b,c	17	45435900	7.17e-10	3.59e-10	1.3e-06	NA
CRHR1a,b,c	17	45784280	5.68e-20	1.79e-17	3.45e-08	1.9e-20
SPPL2Ca,b,c	17	45844881	1.93e-18	1.93e-18	NA	NA
MAPTa,b,c	17	45894382	1.84e-11	9.2e-12	5.86e-09	NA
ARL17Bb,c	17	46274784	6.41e-16	3.8e-05	0.235	2.14e-16
LRRC37Ab,c	17	46292733	1.04e-19	0.00205	0.178	3.46e-20
ARL17Ab,c,e	17	46516702	2.14e-06	7.97e-07	0.000456	6.96e-06
WNT9Bb,c	17	46833201	2.48e-19	NA	NA	2.48e-19
GOSR2b,c,e	17	46923075	5.26e-09	0.517	NA	2.63e-09
u a denotes Known GWAS risk genes of PD reported in GWAS Catalogue.
u b denotes TWAS risk genes also identified by bulk TWAS-O analyses.
u c denotes TWAS risk genes also identified by bulk PWAS-O analyses.
u d denotes independent risk genes.
u e denotes cell-type-specific TWAS risk genes only identified by this cell type.

## Sheet: Supp. Data5. Inhibitory Neurons
Supplementary Data 5. Cell-type-aware TWAS-O risk genes of PD in Inhibitory Neurons.
Cell-type-aware TWAS-O results showing the chromosome, start position, TWAS-O p-value, TWAS p-values by TIGAR/DPR, PrediXcan/EN, and FUSION.
Gene	CHR	Start Position	TWAS-O P-value	TIGAR P-value	PrediXcan P-value	FUSION P-value
OTOFc,d,e	2	26457203	7.15e-07	7.15e-07	NA	NA
CENPAc,e	2	26764289	1.75e-06	NA	NA	1.75e-06
TMEM163a,d	2	134455759	6.64e-07	5.03e-05	2.22e-07	0.00223
CC2D2Aa,b,c,d,e	4	15469865	4.75e-07	2.38e-07	NA	0.299
TIGD2e	4	89111500	1.39e-08	6.94e-09	NA	6.57e-05
GPRIN3a,b	4	89236383	9.13e-08	9.13e-08	NA	NA
CCSER1a,b,d	4	90127535	6.26e-08	3.14e-08	NA	1.45e-05
GPNMBa,b,c,d	7	23235967	2.33e-07	1.08e-07	2.74e-07	0.000145
NME3b,c,d,e	16	1770286	1.63e-07	0.993	NA	8.14e-08
IGFALSb,c,e	16	1790413	1.47e-07	0.148	NA	7.36e-08
ADAM11b,c	17	44758988	1.22e-13	0.00771	NA	6.12e-14
HIGD1Bb,c	17	44846353	3.61e-17	3.61e-17	NA	NA
DCAKDb,c,d	17	45023340	2.84e-19	0.88	0.0487	9.47e-20
FMNL1a,b,c	17	45221444	1.27e-18	0.073	NA	6.34e-19
PLEKHM1a,b,c,d	17	45435900	1.49e-09	1.49e-09	NA	NA
SPPL2Ca,b,c	17	45844881	8.85e-15	8.84e-15	NA	NA
KANSL1a,b,c	17	46029916	1.56e-06	0.0378	0.000212	5.22e-07
LRRC37A2b,c	17	46511511	2.17e-07	7.24e-08	0.0112	0.464
WNT9Bb,c	17	46833201	4.1e-09	4.1e-09	NA	NA
u a denotes Known GWAS risk genes of PD reported in GWAS Catalogue.
u b denotes TWAS risk genes also identified by bulk TWAS-O analyses.
u c denotes TWAS risk genes also identified by bulk PWAS-O analyses.
u d denotes independent risk genes.
u e denotes cell-type-specific TWAS risk genes only identified by this cell type.

## Sheet: Supp. Data 6. Oligodendrocytes
Supplementary Data 6. Cell-type-aware TWAS-O risk genes of PD in Oligodendrocytes.
Cell-type-aware TWAS-O results showing the chromosome, start position, TWAS-O p-value, TWAS p-values by TIGAR/DPR, PrediXcan/EN, and FUSION.
Gene	CHR	Start Position	TWAS-O P-value	TIGAR P-value	PrediXcan P-value	FUSION P-value
CD38a,b,c,d	4	15778275	4.73e-13	2.62e-06	1.58e-13	0.308
GPRIN3a,b,d	4	89236383	9.75e-07	0.00276	0.00471	3.25e-07
C16orf91b,c,d,e	16	1419752	6.45e-07	0.0135	NA	3.22e-07
CCDC43b,c	17	44673069	5.86e-10	5.86e-10	NA	NA
GJC1b,c	17	44798448	1.27e-08	1.27e-08	NA	NA
EFTUD2b,c	17	44849948	2.3e-18	NA	NA	2.3e-18
GFAPb,c	17	44903159	1.72e-19	NA	NA	1.72e-19
KIF18Bb,c	17	44924709	2.89e-09	2.89e-09	NA	NA
PLCD3b,c	17	45108959	3.15e-20	NA	NA	3.15e-20
ACBD4b,c	17	45132600	2.86e-19	8.52e-05	NA	1.43e-19
HEXIM1b,c	17	45148475	1.09e-10	1.09e-10	NA	NA
FMNL1a,b,c	17	45221444	3.95e-10	1.98e-10	0.654	NA
ARHGAP27a,b,c	17	45393902	6.52e-19	0.00137	NA	3.26e-19
PLEKHM1a,b,c	17	45435900	1.94e-19	4.42e-08	0.382	6.47e-20
CRHR1a,b,c	17	45784280	4.67e-14	4.67e-14	NA	NA
MAPTa,b,c	17	45894382	1.37e-20	1.17e-20	NA	1.64e-20
STHb,c	17	45999250	8e-16	0.534	NA	4e-16
KANSL1a,b,c	17	46029916	2.78e-13	4.61e-05	0.0176	9.28e-14
ARL17Bb,c	17	46274784	1.23e-12	4.28e-13	1.01e-11	0.014
LRRC37Ab,c	17	46292733	6.19e-08	2.06e-08	0.711	0.345
WNT3a,b,c,d,e	17	46762506	5.32e-08	2.66e-08	0.212	NA
u a denotes Known GWAS risk genes of PD reported in GWAS Catalogue.
u b denotes TWAS risk genes also identified by bulk TWAS-O analyses.
u c denotes TWAS risk genes also identified by bulk PWAS-O analyses.
u d denotes independent risk genes.
u e denotes cell-type-specific TWAS risk genes only identified by this cell type.

## Sheet: Supp. Data 7. Opc
Supplementary Data 7. Cell-type-aware TWAS-O risk genes of PD in Opcs.
Cell-type-aware TWAS-O results showing the chromosome, start position, TWAS-O p-value, TWAS p-values by TIGAR/DPR, PrediXcan/EN, and FUSION.
Gene	CHR	Start Position	TWAS-O P-value	TIGAR P-value	PrediXcan P-value	FUSION P-value
GPR171d	3	151197832	2.6e-07	8.83e-08	5.61e-06	2.36e-05
NELFAb,d,e	4	1982717	2.36e-06	0.00197	1.18e-06	NA
FAM13Ab,d	4	88725955	1.17e-09	1.17e-09	NA	NA
GPRIN3a,b	4	89236383	1.18e-08	6.01e-09	NA	3.25e-07
CCSER1a,b,d	4	90127535	6.55e-07	6.55e-07	NA	NA
FAHD1b,c,d	16	1826941	1.26e-07	0.00747	NA	6.28e-08
TOX3d,e	16	52436417	1.36e-06	1.98e-06	6.03e-07	2.73e-05
NCOR1b,c,d,e	17	16029157	2.36e-06	2.36e-06	NA	NA
GJC1b,c	17	44798448	2.15e-11	2.15e-11	NA	NA
HIGD1Bb,c	17	44846353	5.59e-17	0.007	0.607	1.86e-17
NMT1b,c,e	17	45051610	1.19e-19	0.649	NA	5.95e-20
ACBD4b,c	17	45132600	8.95e-20	9.17e-10	NA	4.47e-20
HEXIM2b,c,e	17	45160700	8.93e-20	0.362	NA	4.47e-20
SPATA32b,c,e	17	45254393	1.14e-11	1.14e-11	NA	NA
PLEKHM1a,b,c	17	45435900	9.26e-20	1.49e-15	NA	4.63e-20
CRHR1a,b,c	17	45784280	7.68e-20	9.41e-11	NA	3.84e-20
STHb,c	17	45999250	7.77e-20	2.65e-10	NA	3.88e-20
KANSL1a,b,c	17	46029916	8.91e-08	3.19e-08	4.38e-07	0.127
ARL17Bb,c	17	46274784	1.46e-16	1.06e-16	8.96e-17	3.8e-13
LRRC37Ab,c	17	46292733	8.27e-20	3e-08	0.096	2.76e-20
NSFa,b,c,e	17	46590669	3.62e-20	4.99e-11	NA	1.81e-20
RPRMLb,c,d	17	46978156	3.22e-20	3.8e-08	NA	1.61e-20
CDC27b,c,e	17	47117703	2.3e-09	0.802	NA	1.15e-09
u a denotes Known GWAS risk genes of PD reported in GWAS Catalogue.
u b denotes TWAS risk genes also identified by bulk TWAS-O analyses.
u c denotes TWAS risk genes also identified by bulk PWAS-O analyses.
u d denotes independent risk genes.
u e denotes cell-type-specific TWAS risk genes only identified by this cell type.

## Sheet: Supp. Data 8. PWAS-O
Supplementary Data 8. PWAS-O results
Bulk PWAS-O results showing chromosome, start position, FDR q-values derived from omnibus PWAS-O p-values corrected for genomic control factor,
omnibus PWAS-O p-values, and PWAS p-values by TIGAR/DPR, PrediXcan/EN and FUSION
Gene	CHR	Start Position	FDR q-value	PWAS-O P-value	TIGAR P-value	PrediXcan P-value	FUSION P-value
SNX17c	2	27370496	0.00673	1.28e-05	1.45e-05	NA	0.00673
EXOSC7c	3	44976249	0.00158	2.35e-06	NA	NA	0.00158
PDHBb	3	58427630	0.0375	8.72e-05	3.49e-05	0.000137	0.0375
FAM107Ab,c	3	58564112	0.0376	0.000127	3.05e-05	NA	0.0376
CD38a,b,c	4	15778308	5.19e-11	3.3e-14	8.18e-15	5.04e-17	5.19e-11
GPNMBa,b,c	7	23246697	4.96e-05	4.2e-08	9.96e-10	7.39e-09	4.96e-05
CTSBa,b,c	8	11842525	0.0376	0.000104	0.00025	2.48e-05	0.0376
SEC23IPa,c	10	119892573	0.0449	0.000162	5.45e-05	0.000283	0.0449
VPS26Bc	11	134224605	0.00107	1.36e-06	7.27e-08	NA	0.00107
RPS2b	16	1962061	0.0363	7.68e-05	1.68e-05	NA	0.0363
RAB26b	16	2148144	0.0376	0.000112	0.92	0.0998	0.0376
MLST8b	16	2205177	0.0376	0.000126	6.07e-05	NA	0.0376
TTC19b,c	17	15999380	0.0376	0.000115	0.000692	9.16e-06	0.0376
GFAPb	17	44905626	0.00335	5.67e-06	3.92e-07	0.000776	0.00335
NMT1b,c	17	45061299	1.75e-13	3.71e-17	NA	NA	1.75e-13
HEXIM1b	17	45147317	8.1e-05	8.58e-08	5.62e-09	NA	8.1e-05
GOSR2b,c	17	46923120	5.19e-11	2.73e-14	0.534	NA	5.19e-11
u a denotes Known GWAS risk genes of PD reported in GWAS Catalogue.
u b denotes TWAS risk genes also identified by bulk TWAS-O.
u c denotes independent risk genes.

## Sheet: Supp.Data 9. Replication Study
Supplementary Data 9. TWAS/PWAS risk genes replicated for global parkinsonian score and PD pathology using individual-level ROS/MAP GWAS data.
Columns include phenotype, omics data used to derive xQTL weights, chromosome, start position, gene name, replication TWAS/PWAS p-values.
Phenotype	Omics xQTL weights	CHR	Start Position	GeneName	TWAS-O P-value
Global parkinsonian score	Bulk	2	26457203	OTOF	0.0426169
Global parkinsonian score	Ast	4	89236383	GPRIN3	0.0202289
Global parkinsonian score	Ast	16	1349240	TSR3	0.0429619
Global parkinsonian score	Ex	4	89700345	SNCA	0.0154847
Global parkinsonian score	Ex	17	45160700	HEXIM2	0.0442898
Global parkinsonian score	In	4	1982717	NELFA	0.0229933
Global parkinsonian score	In	8	11842524	CTSB	0.00684603
Global parkinsonian score	Mic	3	45001548	CLEC3B	0.0125836
Global parkinsonian score	Mic	17	44673069	CCDC43	0.0463624
Global parkinsonian score	Mic	17	45160700	HEXIM2	0.0225541
PD pathology	Bulk	2	26457203	OTOF	0.000850384
PD pathology	Bulk	17	15944917	ADORA2B	0.0349695
PD pathology	Bulk	17	15976560	ZSWIM7	0.0317778
PD pathology	Bulk	17	46274784	ARL17B	0.036399
PD pathology	Ast	1	226144679	ACBD3	0.0416865
PD pathology	Ast	11	134224671	VPS26B	0.0239899
PD pathology	Ex	2	26457203	OTOF	0.0402797
PD pathology	Ex	3	45001548	CLEC3B	1.39335e-60
PD pathology	Ex	3	58505136	ACOX2	2.01339e-16
PD pathology	Ex	4	1009936	FGFRL1	0.033517
PD pathology	Ex	4	15703065	BST1	1.97086e-52
PD pathology	In	2	26457203	OTOF	3.49918e-06
PD pathology	In	3	58505136	ACOX2	3.00219e-08
PD pathology	Mic	2	27086747	KHK	0.0407647
PD pathology	Mic	3	45001548	CLEC3B	0.0116591
PD pathology	Mic	3	58505136	ACOX2	2.87072e-16
PD pathology	Mic	4	986997	IDUA	8.98428e-08
PD pathology	Mic	4	15703065	BST1	0.0471027
PD pathology	Mic	4	1982717	NELFA	0.0435582
PD pathology	Mic	4	15778275	CD38	4.35981e-29
PD pathology	Oli	4	986997	IDUA	1.06199e-13
PD pathology	Opc	2	26457203	OTOF	2.58017e-13
PD pathology	Opc	3	58505136	ACOX2	4.42932e-10
PD pathology	Opc	4	986997	IDUA	1.04635e-12
PD pathology	Opc	4	89879532	MMRN1	2.80791e-14
PD pathology	Pro	16	1962061	RPS2	5.28775e-10
PD pathology	Pro	16	1444933	CLCN7	1.7358e-32
PD pathology	Pro	16	2205177	MLST8	1.54828e-08
PD pathology	Pro	17	44677437	CCDC43	6.69691e-07
PD pathology	Pro	17	44759200	ADAM11	5.31002e-08
PD pathology	Pro	17	45147317	HEXIM1	4.64761e-10
PD pathology	Pro	17	46923120	GOSR2	1.07945e-12

## Sheet: Table S10. Enrichment Analysis
Supplementary Data 10. Gene set enrichment analysis results by PathDIP.
Pathway enrichment results for xWAS-O risk genes of PD detected from integrating snRNA-seq, bulk RNA-seq, and proteomics data with GWAS summary data.
Columns include pathway source, pathway name, corresponding reference, nominal p-value, Benjamini–Hochberg FDR q-value, Bonferroni-corrected q-value, enrichment type, and functional category.
Data Source	Pathway Source	Pathway Name	References	p-value	q-value (FDR: BH-method)	q-value (Bonferroni)	Type	Category	Genes
snRNA-seq	Panther_Pathway	Huntington disease	Glaser et al.; Neurosci Bull; PMID: 33026587	5.76112e-05	0.003111	0.003111	Diseases	Neuropsychiatric and neurodevelopmental disorders	ARHGAP27, EFTUD2, HEXIM1, MAP3K14, MAPT, NCOR1, NMT1, SNCA
snRNA-seq	Panther_Pathway	De novo purine biosynthesis	Garcia-Esparcia et al.; Neuropathol Appl Neurobiol; PMID: 25597950	0.000199708	0.00539212	0.0107842	Metabolism	Nucleotide metabolism	EFTUD2, FAHD1, NME3
snRNA-seq	Panther_Pathway	Apoptosis signaling pathway	Mochizuki et al.; J Neurol Sci; PMID: 8782165	0.000773804	0.0139285	0.0417854	Cellular processes and organization	Cell growth and death	EIF2S2, ERCC8, MAP3K14, MAPT, NCOR1, NMT1, SNCA
snRNA-seq	Panther_Pathway	T cell activation	Lindestam Arlehamn et al.; Nat Commun; PMID: 32313102	0.0020036	0.0216389	0.108194	Organismal systems	Immune system	ARHGAP27, CD38, MAP3K14, MAPT, NSF, SNCA
snRNA-seq	Panther_Pathway	Glycolysis	Knight et al.; Cell Metab; PMID: 24882066	0.00260911	0.023482	0.140892	Metabolism	Carbohydrate metabolism	EFTUD2, HEXIM1, MAPT
snRNA-seq	Panther_Pathway	De novo pyrimidine ribonucleotides biosythesis	Vincenzetti et al.; Curr Med Chem; PMID: 27063261	0.00190794	0.0257572	0.103029	Metabolism	Nucleotide metabolism	EFTUD2, NME3
snRNA-seq	Panther_Pathway	5HT3 type receptor mediated signaling pathway	Kwan et al.; Eur J Pharmacol; PMID: 31926127	0.00626527	0.0281937	0.338325	Organismal systems	Nervous system	GJC1, NSF
snRNA-seq	Panther_Pathway	Synaptic vesicle trafficking	Pan et al.; J Neurosci; PMID: 29054882	0.00483239	0.0289943	0.260949	Organismal systems	Nervous system	NSF, SNCA
snRNA-seq	Panther_Pathway	Adrenaline and noradrenaline biosynthesis	Healy et al.; Ann Neurol; PMID: 14991826	0.00546228	0.0294963	0.294963	Metabolism	Lipid metabolism	NSF, SNCA
snRNA-seq	Panther_Pathway	Cytoskeletal regulation by Rho GTPase	Zhou et al.; Mol Cell Neurosci; PMID: 21699982	0.00716868	0.0297776	0.387109	Organismal systems	Cell motility	ARHGAP27, EFTUD2, HEXIM1, MAPT
snRNA-seq	Panther_Pathway	CCKR signaling map	Boyce et al.; Clin Neuropharmacol; PMID: 1976438	0.00624177	0.0306414	0.337056	Environmental information processing	Signal transduction	ARHGAP27, CD38, CDC27, GFAP, MAP3K14, MAPT, NCOR1, SNCA
snRNA-seq	Panther_Pathway	Muscarinic acetylcholine receptor 1 and 3 signaling pathway	Ztaou et al.; J Neurosci; PMID: 27581457	0.00464986	0.0313866	0.251092	Organismal systems	Nervous system	MAPT, NSF, SNCA
snRNA-seq	Panther_Pathway	Parkinson disease	Lees et al.; Lancet; PMID: 19524782	0.00426366	0.0328911	0.230238	Diseases	Neuropsychiatric and neurodevelopmental disorders	EFTUD2, ERCC8, FAM13A, HEXIM1, MAP3K14, MAPT, SNCA
snRNA-seq	Panther_Pathway	Inflammation mediated by chemokine and cytokine signaling pathway	Jiang et al.; NPJ Parkinsons Dis; PMID: 37491350	0.00902002	0.0347915	0.487081	Organismal systems	Immune system	ARHGAP27, CRHR1, MAP3K14, MAPT, SNCA
bulk RNA-seq	Panther_Pathway	Heterotrimeric G-protein signaling pathway-Gi alpha and Gs alpha mediated pathway	Shibuya; J Neural Transm; PMID: 458431	0.000147794	0.00635514	0.00635514	Environmental information processing	Signal transduction	ADORA2B, CRHR1, GAK, SH3GL2
bulk RNA-seq	Panther_Pathway	Huntington disease	Glaser et al.; Neurosci Bull; PMID: 33026587	0.00132363	0.014229	0.0569161	Diseases	Neuropsychiatric and neurodevelopmental disorders	GAK, HEXIM1, MAPT, NCOR1, UBE2I
bulk RNA-seq	Panther_Pathway	Muscarinic acetylcholine receptor 1 and 3 signaling pathway	Ztaou et al.; J Neurosci; PMID: 27581457	0.00105507	0.0151227	0.045368	Organismal systems	Nervous system	MAPT, NSF, RAB29
bulk RNA-seq	Panther_Pathway	T cell activation	Lindestam Arlehamn et al.; Nat Commun; PMID: 32313102	0.00101536	0.0218302	0.0436605	Organismal systems	Immune system	CD38, MAPT, NSF, SH3GL2, UBE2I
bulk RNA-seq	Panther_Pathway	TGF-beta signaling pathway	Tesseur et al.; J Neurosci; PMID: 28363982	0.0160982	0.0432639	0.692223	Environmental information processing	Signal transduction	MAPT, NCOR1, UBE2I
bulk RNA-seq	Panther_Pathway	Metabotropic glutamate receptor group III pathway	Konieczny et al.; Neuroscience; PMID: 17224239	0.0147017	0.0451552	0.632173	Metabolism	Metabolism of amino acids and derivatives	CRHR1, NSF
bulk RNA-seq	Panther_Pathway	p38 MAPK pathway	Gui et al.; Toxicol Appl Pharmacol; PMID: 31881179	0.0160744	0.0460799	0.691199	Environmental information processing	Signal transduction	MAPT, UBE2I
bulk RNA-seq	Panther_Pathway	Metabotropic glutamate receptor group II pathway	Dawson et al.; Br J Pharmacol; PMID: 10711353	0.0142158	0.0470215	0.611279	Metabolism	Metabolism of amino acids and derivatives	CRHR1, NSF
bulk RNA-seq	Panther_Pathway	Histamine H1 receptor mediated signaling pathway	Rocha et al.; J Neuroinflammation; PMID: 27260166	0.01953	0.0493994	0.83979	Environmental information processing	Signal transduction	MAPT, RAB29
bulk RNA-seq	Panther_Pathway	Heterotrimeric G-protein signaling pathway-Gq alpha and Go alpha mediated pathway	Volta et al.; Cell Signal; PMID: 27871937	0.0207936	0.0496736	0.894125	Environmental information processing	Signal transduction	ADORA2B, RAB29
proteomics	Panther_Pathway	CCKR signaling map	Boyce et al.; Clin Neuropharmacol; PMID: 1976438	0.00704336	0.0140867	0.0422602	Environmental information processing	Signal transduction	CD38, GFAP, RPS2, SNX17
proteomics	Panther_Pathway	ATP synthesis	Ludtmann et al.; Nat Commun; PMID: 29895861	0.00236865	0.0142119	0.0142119	Metabolism	Energy metabolism	HEXIM1, PDHB
proteomics	Panther_Pathway	T cell activation	Lindestam Arlehamn et al.; Nat Commun; PMID: 32313102	0.0064317	0.0192951	0.0385902	Organismal systems	Immune system	CD38, PDHB, SN17
